# Supplementary material for: Primary human testicular PDGFRα+ cells are multipotent and can be differentiated into cells with Leydig cell characteristics in vitro
Source: PubMed Central journal article supplement — Hum Reprod. 2019 Aug 9;34(9):1621–31. doi: 10.1093/humrep/dez131 (PMC6735802; doi:10.1093/humrep/dez131), 2019-08-09
Supplement: supp_f1_dez131.pdf [file supp_f1_dez131.pdf]

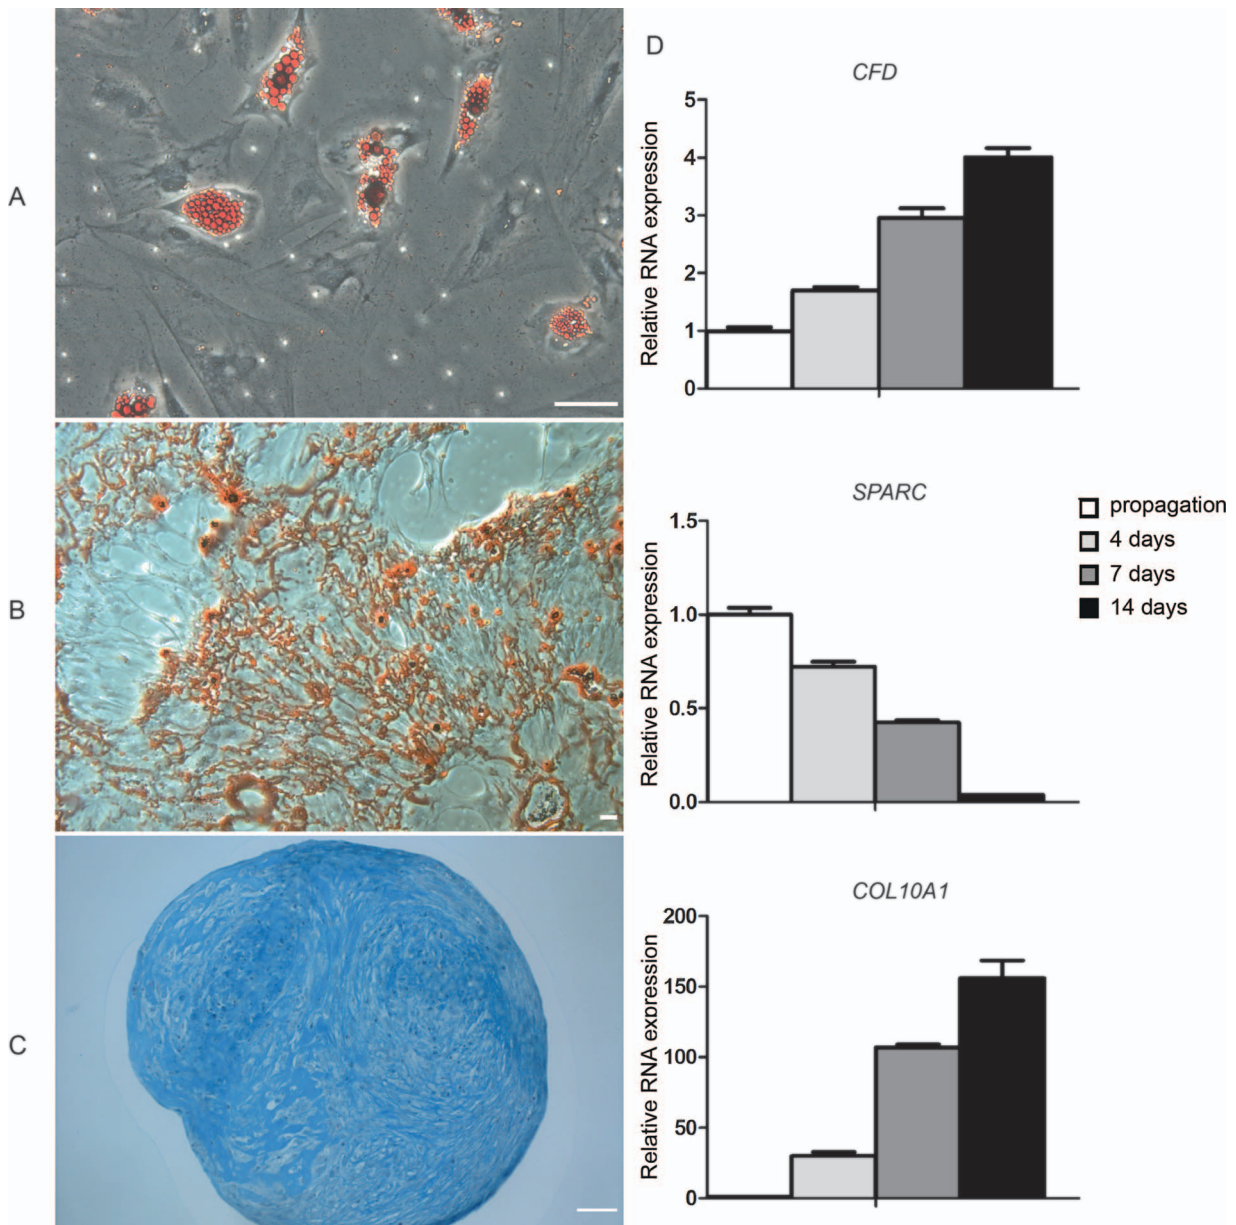

**Supplementary Figure S1** Trilineage differentiation of MSCs. Trilineage differentiation of isolated MSCs derived from fat, used as a positive control, into adipocytes (Oil Red O) (A), osteocytes (Alizarin Red) (B) and chondrocytes (Alcian blue) (C). Scale bar is 50  $\mu$ m. Gene expression of the corresponding genes (D). MSC: mesenchymal stromal cell.
