# Supplementary material for: Primary human testicular PDGFRα+ cells are multipotent and can be differentiated into cells with Leydig cell characteristics in vitro
Source: PubMed Central journal article supplement — Hum Reprod. 2019 Aug 9;34(9):1621–31. doi: 10.1093/humrep/dez131 (PMC6735802; doi:10.1093/humrep/dez131), 2019-08-09
Supplement: supp_f2_dez131.pdf [file supp_f2_dez131.pdf]

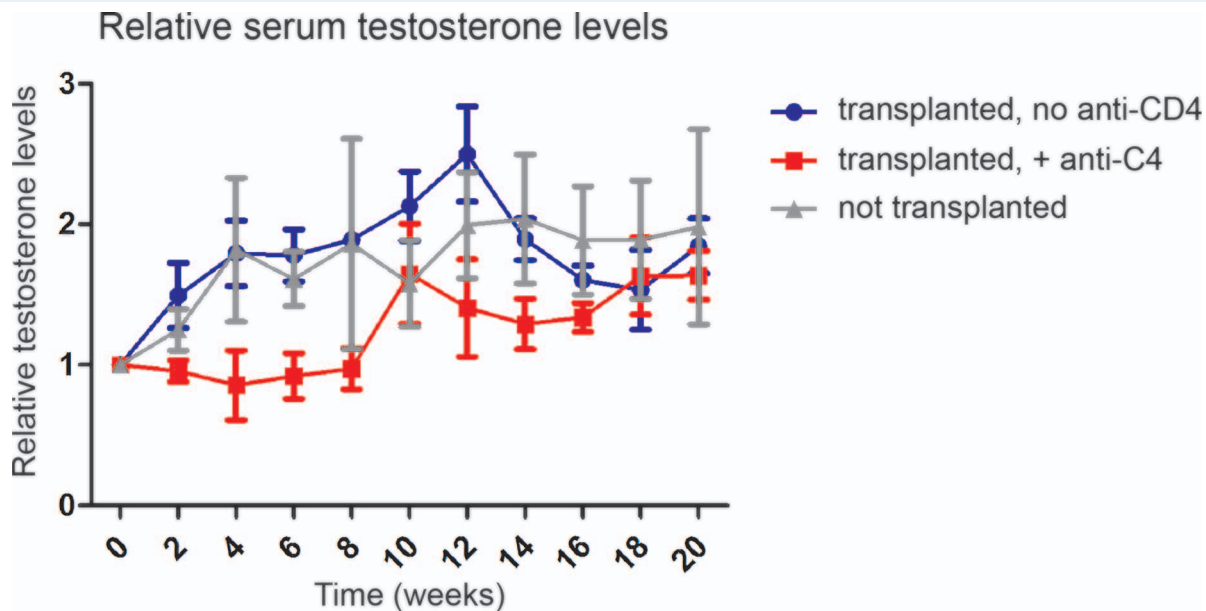

**Supplementary Figure S2** Changes in serum testosterone levels after transplantation of human PDGFR $\alpha^+$  cells into LuRKO mouse testis. Every 2 weeks, serum samples were taken to measure testosterone levels. The rate of change in serum testosterone levels is relative to the serum testosterone levels before transplantation, which is considered a value of 1. PDGFR $\alpha$ : platelet-derived growth factor receptor alpha; LuRKO: luteinizing hormone receptor knock-out.
