# Supplementary material for: Primary human testicular PDGFRα+ cells are multipotent and can be differentiated into cells with Leydig cell characteristics in vitro
Source: PubMed Central journal article supplement — Hum Reprod. 2019 Aug 9;34(9):1621–31. doi: 10.1093/humrep/dez131 (PMC6735802; doi:10.1093/humrep/dez131), 2019-08-09
Supplement: supp_t1_dez131.pdf [file supp_t1_dez131.pdf]

**Supplementary Table S1 Detailed list of antibodies used.**

| Antibodies                           | Label       | Company, catalog number | Lot number   | Concentration used |
|--------------------------------------|-------------|-------------------------|--------------|--------------------|
| Mouse anti-human CD140a (PDGFRa)     | PE          | BD Biosciences, 556002  | 7068640      | 0.6 ug/ml          |
| Mouse IgG2a, K isotype control       | PE          | BD Biosciences, 555574  | 7138693      | 0.6 ug/ml          |
| Mouse anti-human HLA-ABC             | APC         | BD Biosciences, 555555  | 7076781      | 2.5 ug/ml          |
| Mouse IgG1, K isotype control        | APC         | BD Biosciences, 555751  | 5065947      | 2.5 ug/ml          |
| Mouse anti-human CD34                | PE-Cy7      | BD Biosciences, 348811  | 5033938      | 1.25 ug/ml         |
| Mouse BALB/c IgG1, κ isotype control | PE-Cy7      | BD Biosciences, 348808  | 3092914      | 1.25 ug/ml         |
| Mouse anti-human CD90                | FITC        | eBioscience, 11-0909-42 | E12778-10    | 2.5 ug/ml          |
| Mouse IgG1, K isotype control        | FITC        | eBioscience, 11-4714-81 | 1937494      | 2.5 ug/ml          |
| Mouse anti-human CD73                | PerCP-Cy5.5 | BD Biosciences, 561260  | 7110595      | 1 ug/ml            |
| Mouse IgG1, K isotype control        | PerCP-Cy5.5 | BD Biosciences, 550795  | 7080669      | 1 ug/ml            |
| Mouse anti-human CD105               | BV650       | BD Biosciences, 563466  | 7019762      | 1.25 ug/ml         |
| Mouse IgG1, K isotype control        | BV650       | BD Biosciences, 563231  | 7051951      | 1.25 ug/ml         |
| Anti-human nucleoli                  | -           | Abcam, ab190710         | GR-3220406-1 | 2 ug/ml            |
| <b>Live/dead staining</b>            |             |                         |              | <b>Dilution</b>    |
| Zombie Fixable viability dye         | Violet      | Biologend, 423113       |              | 1:1000             |
| 7-AAD                                | Far red     | BD Biosciences, 559925  |              | 1:100              |
