# Supplementary material for: Primary human testicular PDGFRα+ cells are multipotent and can be differentiated into cells with Leydig cell characteristics in vitro
Source: PubMed Central journal article supplement — Hum Reprod. 2019 Aug 9;34(9):1621–31. doi: 10.1093/humrep/dez131 (PMC6735802; doi:10.1093/humrep/dez131), 2019-08-09
Supplement: supp_t2_dez131.pdf [file supp_t2_dez131.pdf]

**Supplementary Table SII Detailed list of primers used for qPCR.**

| Gene                             | ID transcript    | Primer sequence forward | Primer sequence reverse   | Primer concentration | Annealing-temperature |
|----------------------------------|------------------|-------------------------|---------------------------|----------------------|-----------------------|
| EEF2 (PCR genomic contamination) | NM_001961.3      | ACTGTGTGAGGAGAACATGCG   | CAAGGTAGATGGGCTCCATGA     | 10 $\mu$ M           | 63°C                  |
| HEATR6                           | ENST00000184956  | GGCACAGGCTTAATACAGCAG   | CCGTTTCAGCATCATAGTCCA     | 0.25 $\mu$ M         | 65°C                  |
| PLEKHA8                          | NM_001197026.1   | CAACTATCTGAGCGGTTGGC    | TGCAACCTTTCCAGGCATCT      | 0.4 $\mu$ M          | 65°C                  |
| EEF2                             | ENST0000030931.1 | CTGGAGATCTGCCTGAAGGA    | CGACCGGGTCAGATTTCTT       | 0.4 $\mu$ M          | 65°C                  |
| CFD (adipsin)                    | NM_001317335     | TCCAAGCGCCTGTACGAC      | GTGTGGCCTTCTCCGACA        | 0.5 $\mu$ M          | 65°C                  |
| SPARC                            | NM_001040058     | TGCCTGATGAGACAGAGGTGGT  | CTTCGGTTTCCTCTGCACCATC    | 0.25 $\mu$ M         | 65°C                  |
| COL10A1                          | NM_000493        | GGGGCTAAGGGTGAAAGGG     | GGTCCTCCAACCTCCAGGATCA    | 0.25 $\mu$ M         | 65°C                  |
| STAR                             | NM_000349.2      | GGCATCCTTAGCAACCAAGA    | TCTGGGACCACTTTACTCATCA    | 0.4 $\mu$ M          | 65°C                  |
| CYP11A1                          | NM_001099773.1   | ACATCAAGGCCAACGTCACA    | CCAGTGTCTTGGCAGGAATCA     | 0.4 $\mu$ M          | 65°C                  |
| HSD3B2                           | NM_000198.3      | CAGGGATGAGGCAGTAAGGACT  | TGGTCCTGTTCTGGAGCTTAGAAAA | 0.25 $\mu$ M         | 62°C                  |
| HSD17B3                          | NM_000197.1      | GAGATCGAGCGGACTACAGG    | GCGTTCAGGAAATGGCTTGG      | 0.25 $\mu$ M         | 65°C                  |
| CYP17A1                          | NM_000102        | CTATGCTCATCCCCACAAG     | CCTTGTCACAGCAAATCA        | 0.2 $\mu$ M          | 65°C                  |
| INSL3                            | NM_001265587.1   | CTACCCAGACCAATGCCAC     | TCCAGCATCTGTGAAAGCGG      | 0.25 $\mu$ M         | 65°C                  |
| LHCGR                            | NM_000233.3      | AGGGCCGAAAACCTTGGATATT  | AGTGGCTGGGGTAAGTCAAC      | 0.25 $\mu$ M         | 62°C                  |
